# Supplementary material for: Vanilloid-dependent TRPV1 opening trajectory from cryoEM ensemble analysis
Source: PubMed Central journal article supplement (PMC9130279; doi:10.1038/s41467-022-30602-2), 2022-05-24
Supplement: 41467_2022_30602_MOESM1_ESM.pdf [file 41467_2022_30602_MOESM1_ESM.pdf]

1 **Supplementary Information**

2  
3  
4  
5 **Vanilloid-dependent TRPV1 opening trajectory from cryoEM ensembles**

6 Do Hoon Kwon<sup>1</sup>, Feng Zhang<sup>1</sup>, Justin G. Fedor<sup>1</sup>, Yang Suo<sup>1</sup>, Seok-Yong Lee<sup>1,\*</sup>

7 **Affiliations:**

8 <sup>1</sup> Department of Biochemistry, Duke University School of Medicine, Durham, North Carolina,  
9 27710, USA.

10  
11  
12  
13  
14  
15  
16  
17  
18  
19  
20  
21  
22  
23  
24  
25  
26  
27  
28 \*Correspondence to:

29 S.-Y. Lee

30 Email: seok-yong.lee@duke.edu

31 Telephone: 919-684-1005

32

33

34

### a 4°C RTx-TRPV1 dataset

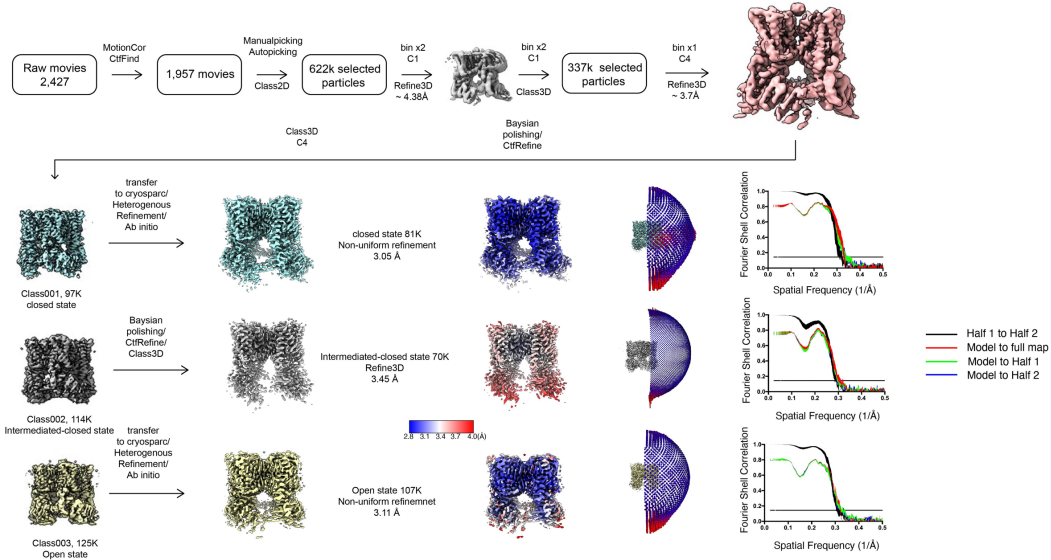

### b 25°C RTx-TRPV1 dataset

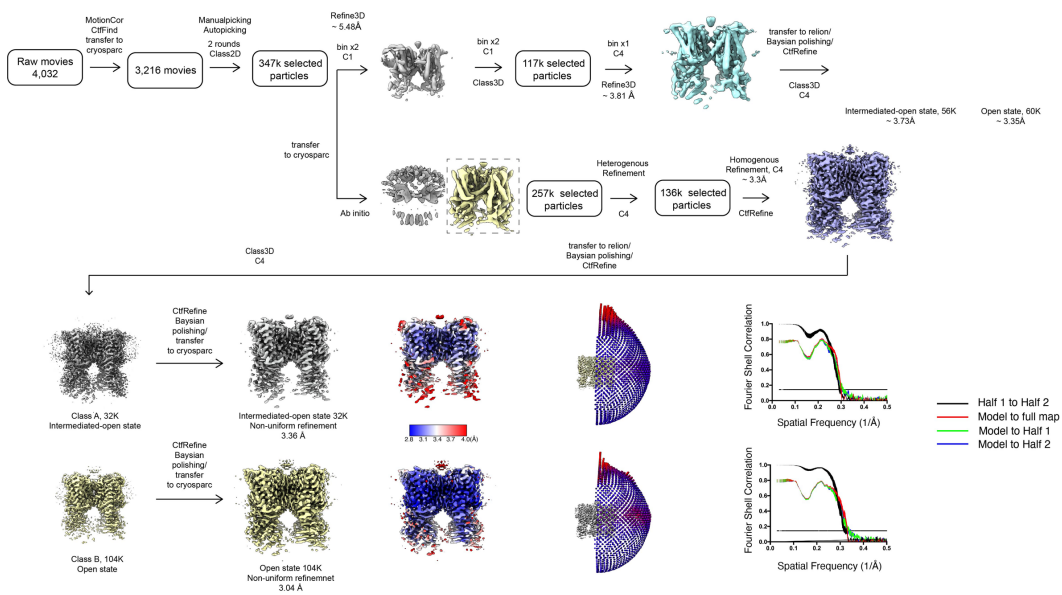

### c 48°C RTx-TRPV1 dataset

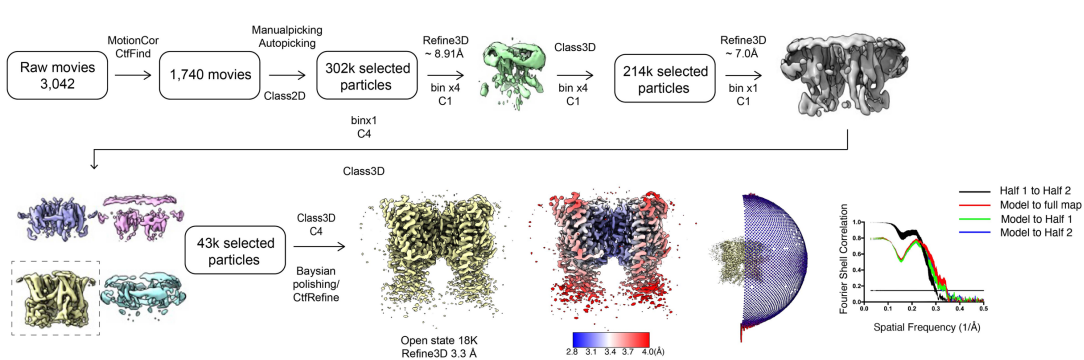

36 **Supplementary Figure 1. TRPV1 data collection and processing.**  
37 **a-c** Cryo-EM data processing procedures for 4°C RT<sub>x</sub>-TRPV1, 25°C RT<sub>x</sub>-TRPV1, and  
38 48°C RT<sub>x</sub>-TRPV1 datasets, respectively. 3D reconstructions, local resolution estimation, the  
39 Euler distribution plot, and FSC curves are shown for TRPV1<sup>C,RT<sub>x</sub></sup>, TRPV1<sup>IC,RT<sub>x</sub></sup>,  
40 TRPV1<sup>O,RT<sub>x</sub>(4°C)</sup>, TRPV1<sup>IO,RT<sub>x</sub></sup>, TRPV1<sup>O,RT<sub>x</sub>(25°C)</sup> and TRPV1<sup>O,RT<sub>x</sub>(48°C)</sup>, respectively.

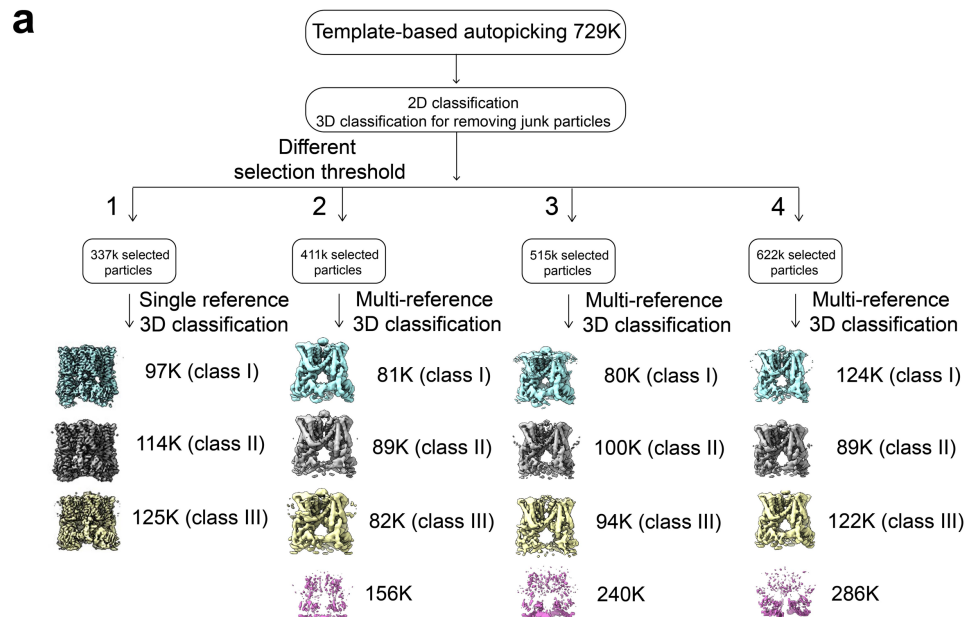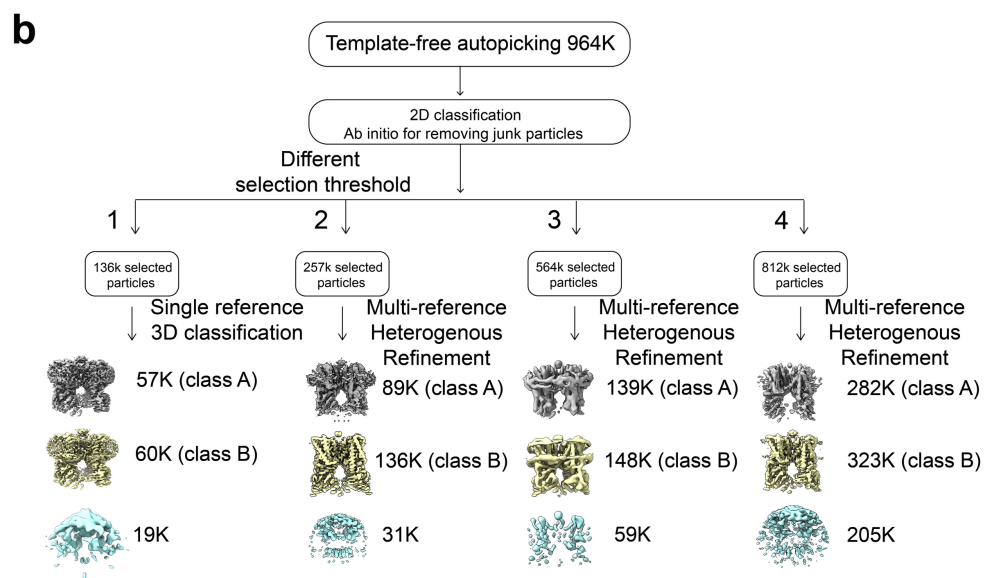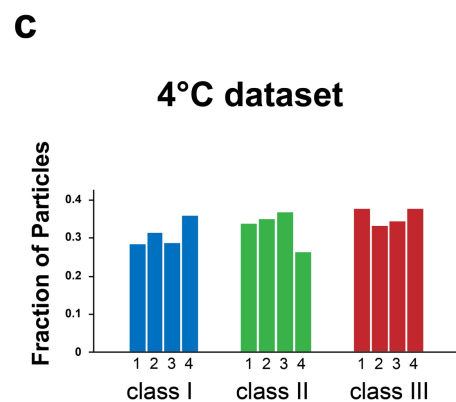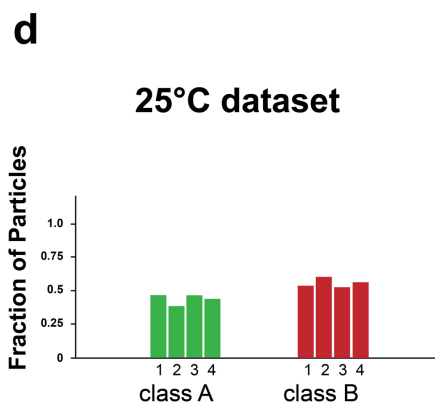

42 **Supplementary Figure 2. Image processing workflow for the particle distribution analysis**

43 **a** Data processing workflow of 4°C RTx dataset for the purpose of particle distribution

44 analysis. **b** Data processing workflow of 25°C RTx dataset for the purpose of particle distribution

45 analysis. **c** Class distributions of particles for the 4°C RTx dataset among independent

46 classification procedures. **d** Class distributions of particles for the 25°C RTx dataset among

47 independent classification procedures

48

49

50

51

52

53

54

55

56

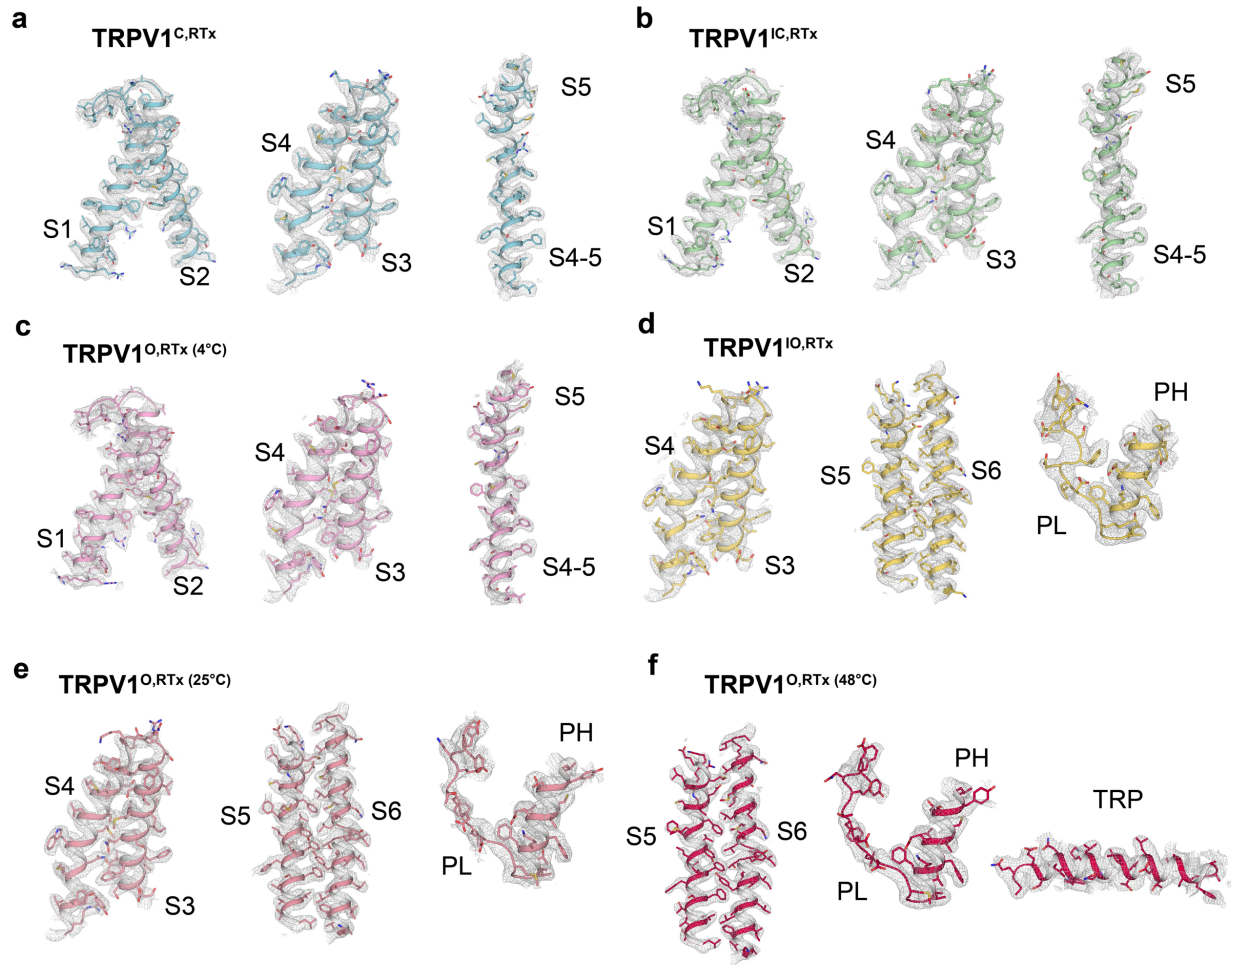

57

58 **Supplementary Figure 3. Representative cryo-EM densities and models of TRPV1 from this**  
 59 **study.**

60 **a-f** Cryo-EM map for subdomains in TRPV1<sup>C,RTx</sup> (**a**, thresholding 0.12), TRPV1<sup>IC,RTx</sup> (**b**,  
 61 thresholding 0.03), TRPV1<sup>O,RTx</sup> at 4°C (**c**, thresholding 0.1), TRPV1<sup>IO,RTx</sup> (**d**, thresholding  
 62 0.11), TRPV1<sup>O,RTx</sup> at 25°C (**e**, thresholding 0.09), and TRPV1<sup>O,RTx</sup> at 48°C (**f**, thresholding  
 63 0.033). Structural elements are shown as sticks and ribbons and EM density as gray mesh.

64

65

**a** IC vs. IO

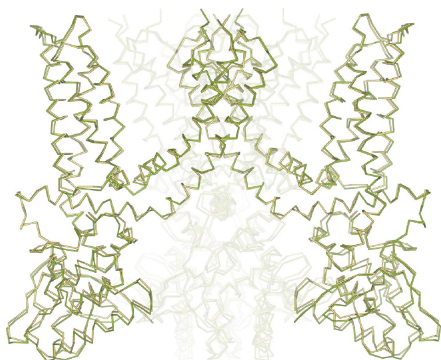

C $\alpha$  RMSD: 0.595

**b**

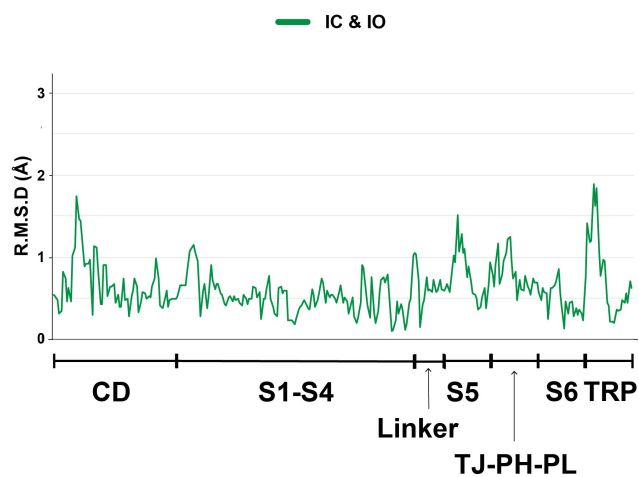

**c** O (4°C) vs. O (25°C) vs. O (48°C)

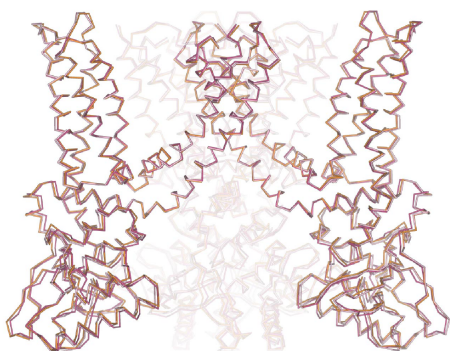

C $\alpha$  RMSD: 0.404 - 0.449

**d**

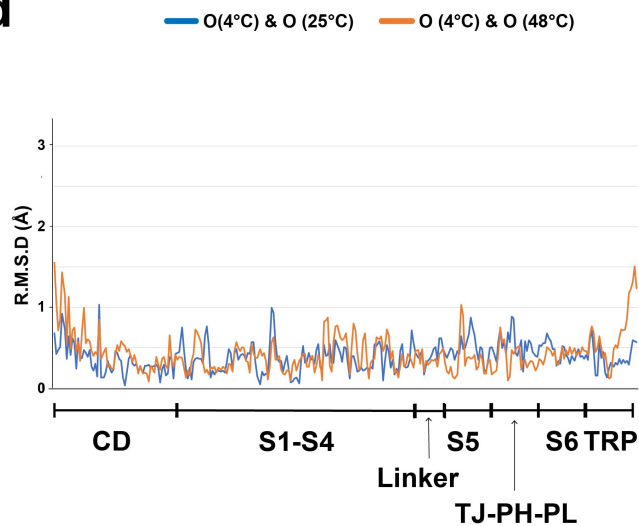

**e**

|          | C     | IC    | IO    | O (4°C) | O (25°C) | O (48°C) |
|----------|-------|-------|-------|---------|----------|----------|
| C        | -     | 0.705 | 0.947 | 1.520   | 1.540    | 1.623    |
| IC       | 0.705 | -     | 0.595 | 1.132   | 1.140    | 1.217    |
| IO       | 0.947 | 0.595 | -     | 1.127   | 1.065    | 1.173    |
| O (4°C)  | 1.520 | 1.132 | 1.127 | -       | 0.404    | 0.449    |
| O (25°C) | 1.540 | 1.140 | 1.065 | 0.404   | -        | 0.427    |
| O (48°C) | 1.623 | 1.217 | 1.173 | 0.449   | 0.427    | -        |

66

67

68 **Supplementary Figure 4. Structural similarity of TRPV1<sup>IC,RTx</sup>, TRPV1<sup>IO,RTx</sup>, TRPV1<sup>O,RTx</sup>**  
69 **(4°C), TRPV1<sup>O,RTx(25°C)</sup> and TRPV1<sup>O,RTx(48°C)</sup>**

70 **a** Comparison of TRPV1<sup>IC,RTx</sup> (green) and TRPV1<sup>IO,RTx</sup> (gold).

71 **b** C $\alpha$  R.M.S.D plot per residue between TRPV1<sup>IC,RTx</sup> and TRPV1<sup>IO,RTx</sup>.

72 **c** Comparison of TRPV1<sup>O,RTx(4°C)</sup> (pink), TRPV1<sup>O,RTx(25°C)</sup> (orange) and TRPV1<sup>O,RTx(48°C)</sup> (red).

73 **d** C $\alpha$  R.M.S.D. plot per residue of TRPV1<sup>O,RTx(4°C)</sup>, TRPV1<sup>O,RTx(25°C)</sup> and TRPV1<sup>O,RTx(48°C)</sup>.

74 **e** C $\alpha$  R.M.S.D. values between the structures reported in this study.

75

76

77

78

79

80

81

82

83

84

85

86



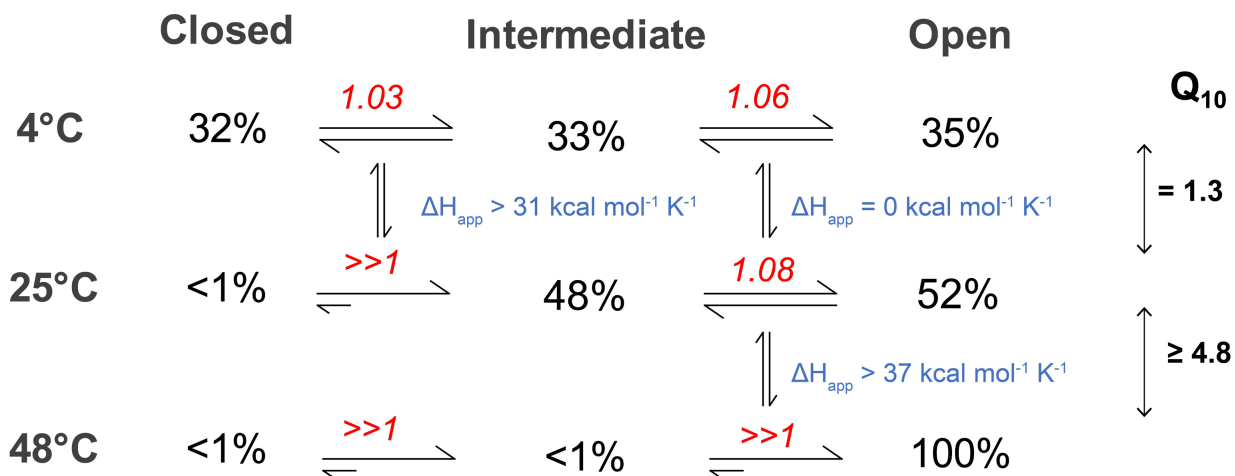

87  
 88 **Supplementary Figure 5. Basic 3-state thermodynamic treatment of the particle distribution**  
 89 **analysis.**

90 Particle distribution for each state shown as percents, with calculated apparent equilibrium  
 91 constants in red. Blue enthalpy values correspond to respective temperature-dependent  
 92 equilibrium shifts. Apparent  $Q_{10}$  values for 4°C to 25°C and 25°C to 48°C transitions are also  
 93 shown.

94  
 95  
 96  
 97  
 98  
 99  
 100

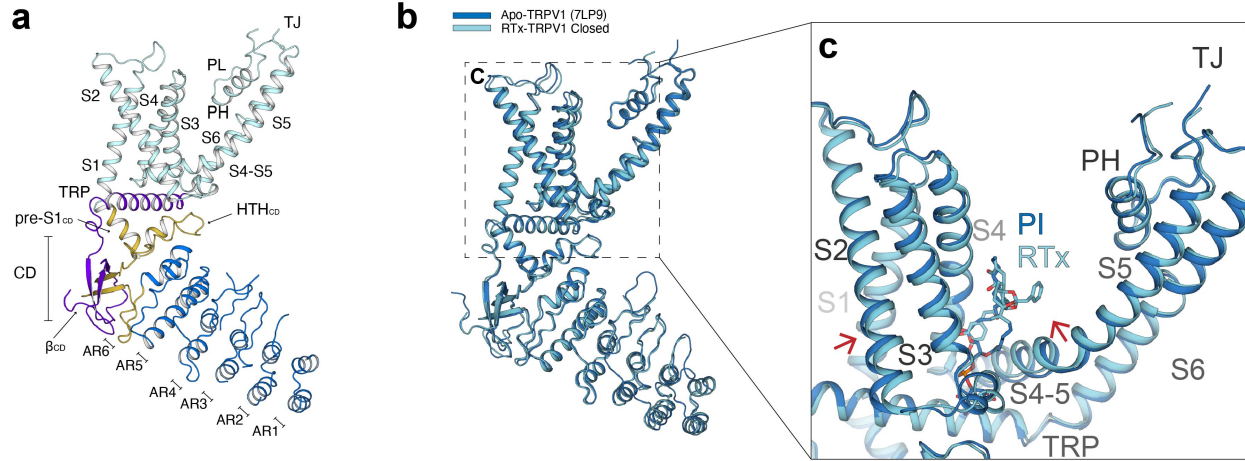

101

102 **Supplementary Figure 6. Monomer architecture and structure comparison between Apo-**  
 103 **TRPV1 and RT<sub>x</sub>-TRPV1 closed state**

104 **a** Architecture of TRPV1 monomer with subdomains indicated: ankyrin-repeat domain

105 (AR1-6), coupling domain (CD – HTHCD and βCD), transmembrane helices (S1-S6), outer-pore  
 106 loop (PL), outer-pore helix (PH), turret junction (TJ), and TRP helix (TRP).

107 **b** Superposition of a single protomer from TRPV1<sup>APO</sup> (blue) and TRPV1<sup>C,RTx</sup> (skyblue).

108 **c** Close-up view of the transmembrane domain compared between TRPV1<sup>APO</sup> and  
 109 TRPV1<sup>C,RTx</sup>.

110

111

112

113

114

115

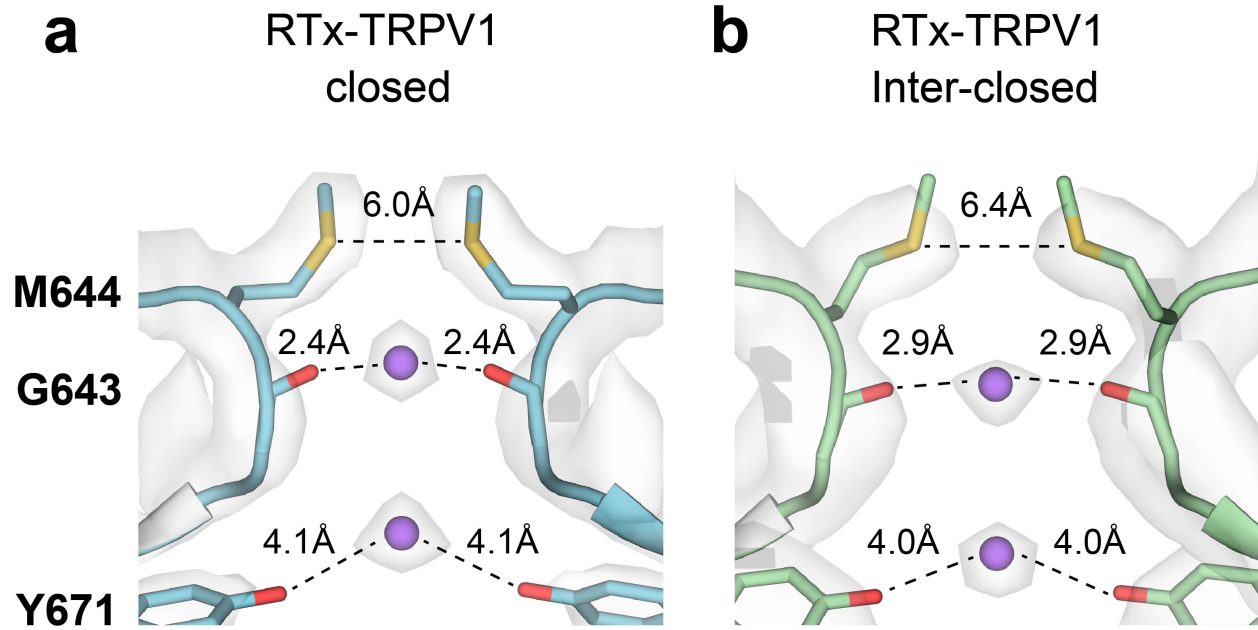

116

117 **Supplementary Figure 7. Cryo-EM densities for the selectivity filter of TRPV1<sup>C,RTx</sup> and**  
 118 **TRPV1<sup>IC,RTx</sup>.**

119 **a-b** Cryo-EM density for the selectivity filter of TRPV1<sup>C,RTx</sup> and TRPV1<sup>IC,RTx</sup>

120 corresponding to the models and putative sodium ions at 0.15 and 0.025 thresholding, respectively.

121

122

123

124

125

126

127

128

129

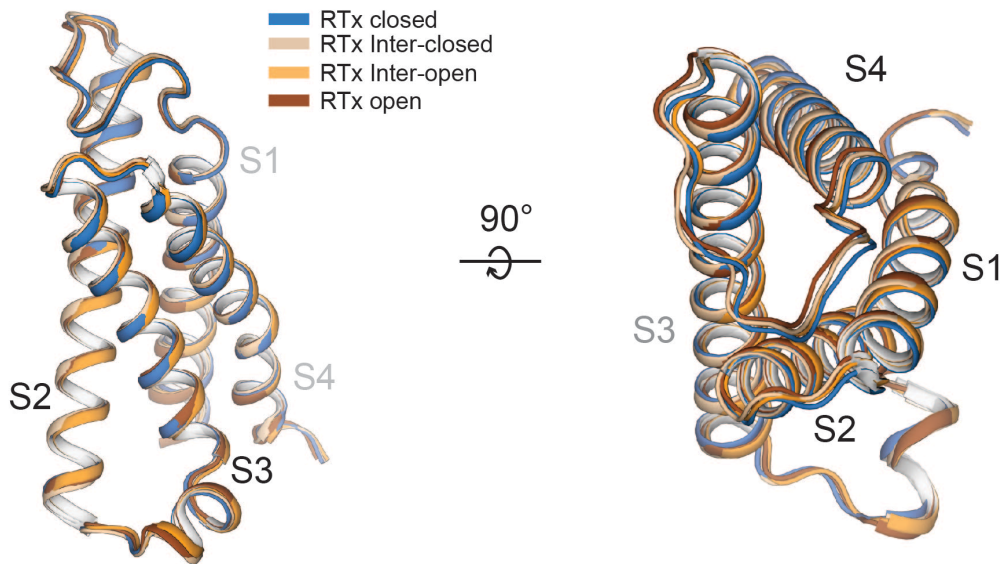

131 **Supplementary Figure 8. The S1-S4 domain comparison of TRPV1<sup>C,RTx</sup>, TRPV1<sup>IC,RTx</sup>,**  
132 **TRPV1<sup>IO,RTx</sup>, and TRPV1<sup>O,RTx</sup>**

133 Superposition of S1-S4 domain from TRPV1<sup>C,RTx</sup> (blue), TRPV1<sup>IC,RTx</sup> (wheat), TRPV1<sup>IO,RTx</sup>  
134 (orange), and TRPV1<sup>O,RTx</sup> (red)

135

136

137

138

139

140

## 48°C Heat-TRPV1 INT (7LPD)

## RTx-TRPV1 IC

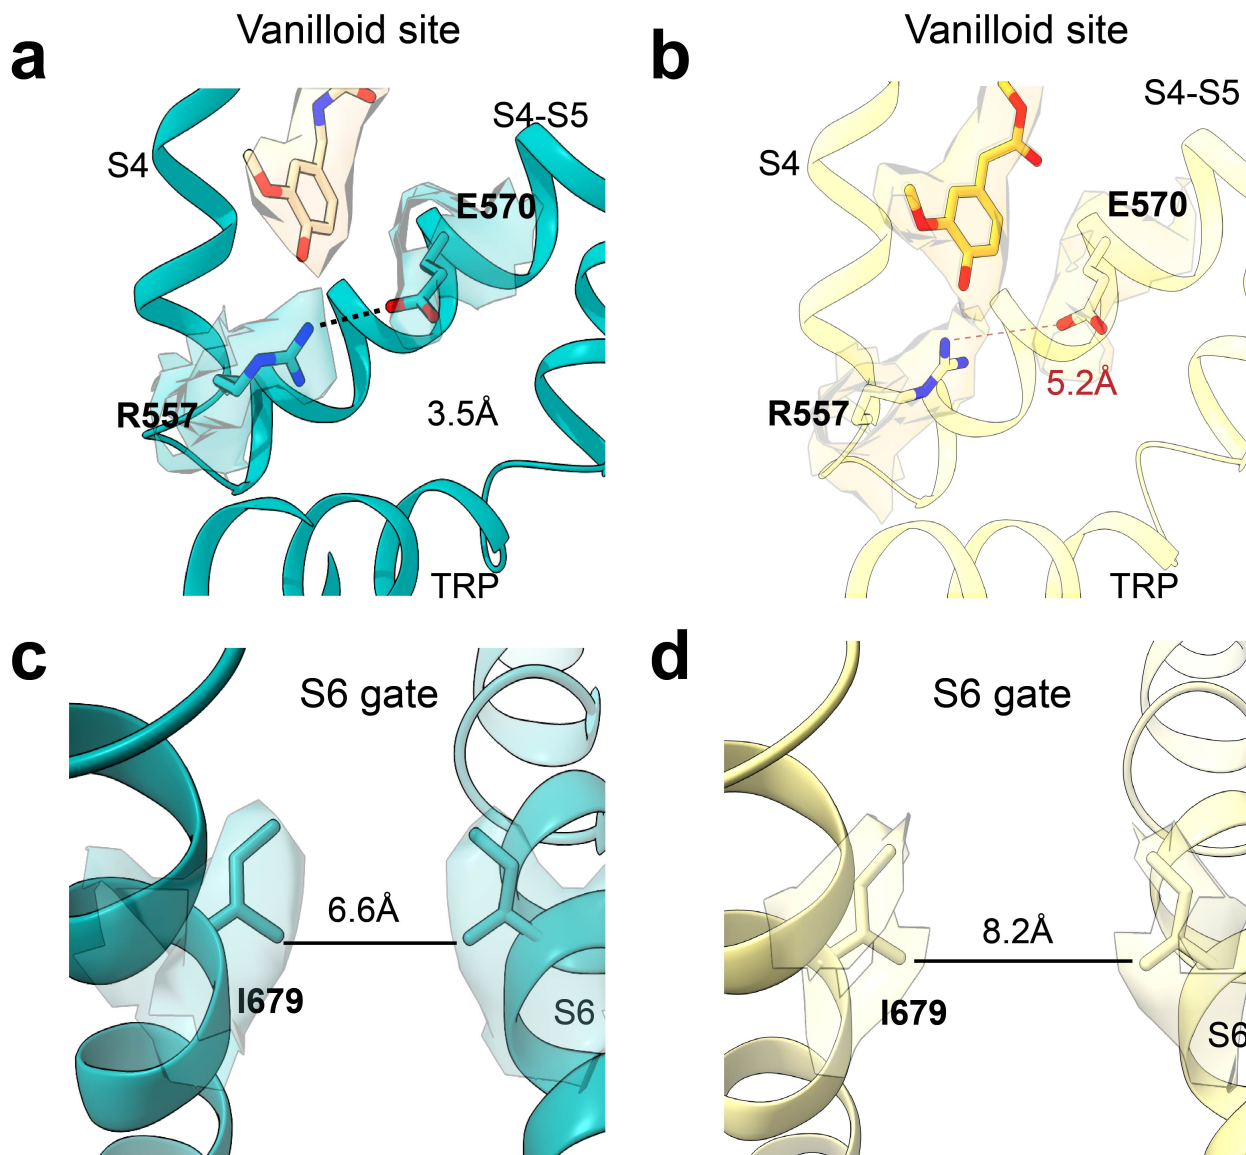

141  
142 **Supplementary Figure 9. Structural comparison between RTx-TRPV1 IC and Heat-TRPV1**  
143 **INT.**

144 **a** The cryo-EM densities and the models of the vanilloid site of TRPV1<sup>Heat,INT</sup> exhibiting the salt  
145 bridge between R557 and E570, thresholding at 0.022. **b** The cryo-EM densities and the models  
146 of the vanilloid site of TRPV1<sup>IC,RTx</sup>, thresholding at 0.038. Note that the salt bridge is not formed  
147 in this intermediate state. **c** The cryo-EM densities and the models of the S6 gate of of

148 TRPV1<sup>Heat,INT</sup>, thresholding 0.03. **d** The cryo-EM densities and the models of the S6 gate of  
149 TRPV1<sup>IC,RTx</sup>, thresholding 0.04.  
150

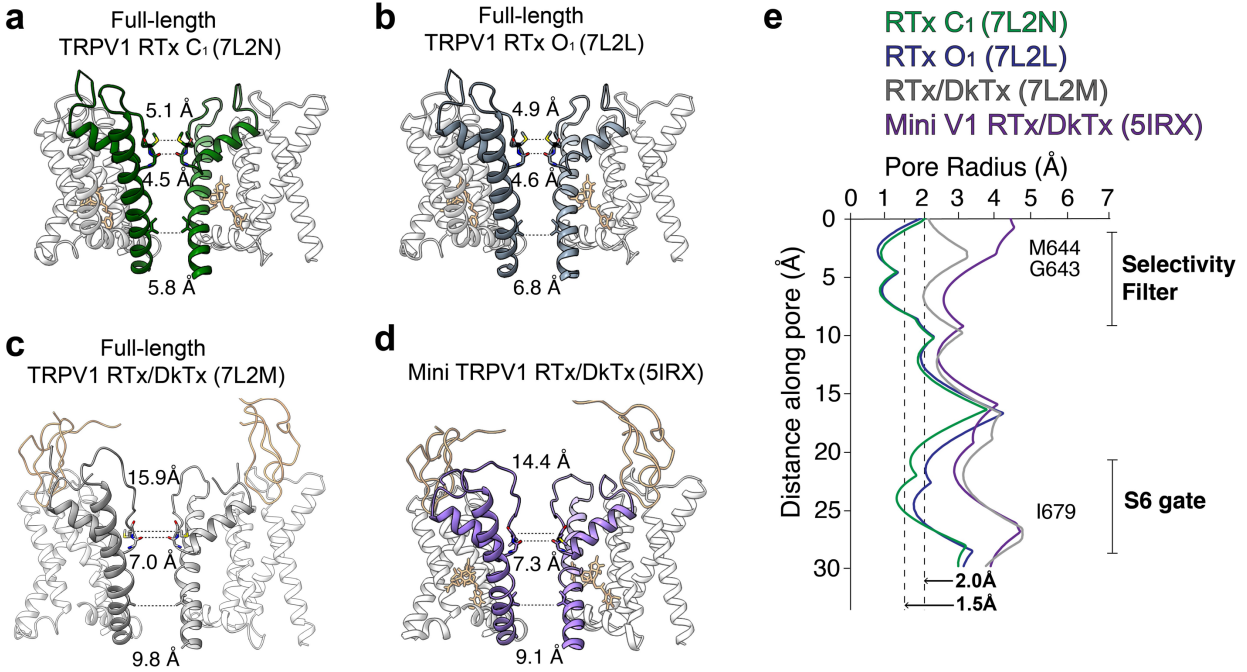

151

152 **Supplementary Figure 10. Permeation pathway analysis of the pore domains of TRPV1<sup>RTx,C1</sup>,**

153 **TRPV1<sup>RTx,O1</sup>, TRPV1<sup>RTx/DkTx, full-length</sup>, and TRPV1<sup>RTx/DkTx, mini</sup>.**

154 **a-d** Only two subunits are shown for clarity, with S6 helix (S6), pore loop (PL) and pore

155 helix (PH) as indicated. Diagonal distances at the two narrowest restriction points are shown.

156 Respective structure PDB codes in parentheses.

157 **e** Pore radii calculated using the HOLE program for the TRPV1 structures as color-coded

158

159

160

161

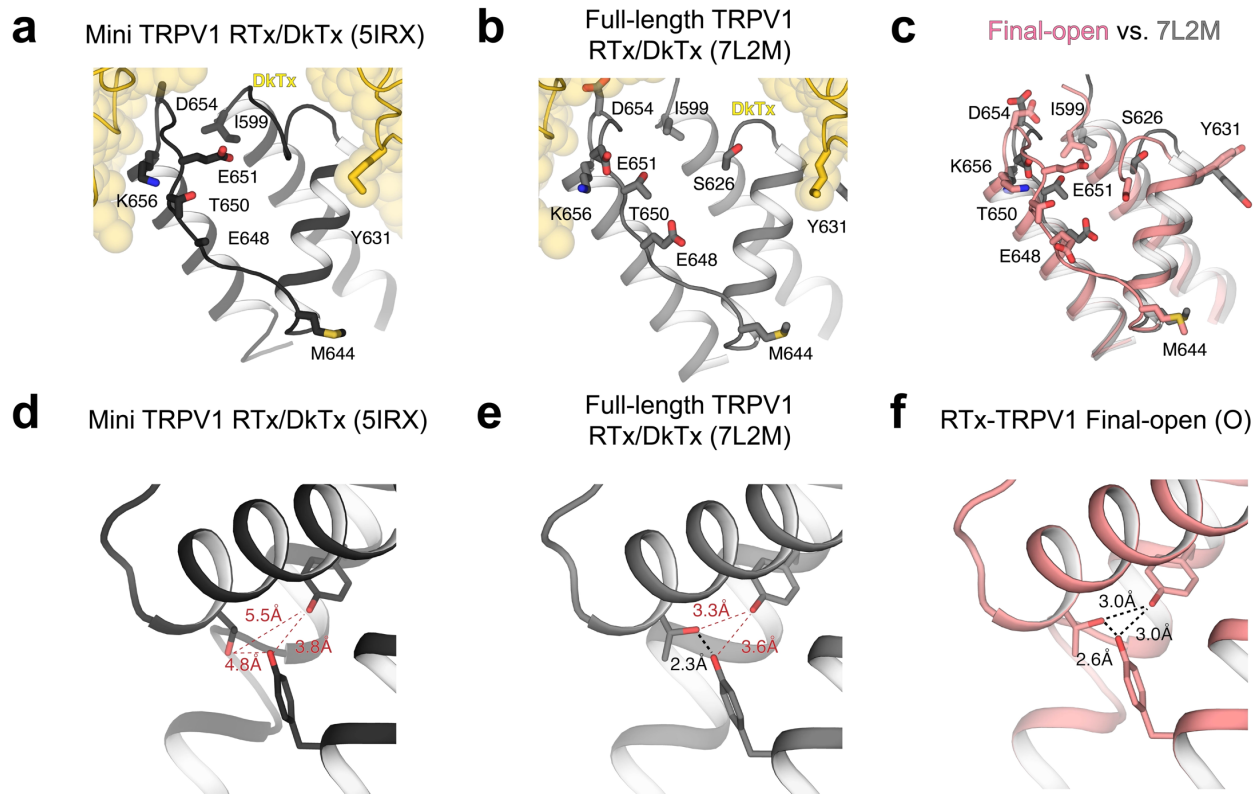

162

163 **Supplementary Figure 11. The pore-loop conformation and PH-S5-S6 triad of the published**  
 164 **full-length RTx O<sub>1</sub>, DkTx/RTx full-length TRPV1, and DkTx/RTx mini TRPV1.**

165 **a,b** Conformational comparison of TRPV1<sup>DkTx/RTx, mini</sup> and TRPV1<sup>DkTx/RTx, full-length</sup> outer

166 pore region. Indicated residues are shown as sticks. DkTx is shown as gold sticks and spheres.

167 **c** Superposition of the outer pore region from TRPV1<sup>DkTx/RTx, full-length</sup> and TRPV1<sup>O,RTx</sup>.

168 **d,e,f** Hydrogen bond triad networks of PH-S5-S6 of TRPV1<sup>DkTx/RTx, mini</sup>, TRPV1<sup>DkTx/RTx, full-length</sup>,

169 and TRPV1<sup>O,RTx</sup>. Black dotted-lines indicate hydrogen bonds and red lines denote

170 distances for broken hydrogen bonds.

171

172



173 **Supplementary Table 1. Cryo-EM data collection, refinement and validation statistics**

|                                                     | 4 °C RTx<br>closed<br>(EMD- 24636,<br>PDB 7RQU) | 4 °C RTx<br>Inter-closed<br>(EMD-<br>24637, PDB<br>7RQV) | 4 °C RTx<br>Open<br>(EMD-<br>24638, PDB<br>7RQW) | 25 °C RTx<br>Inter-open<br>(EMD-<br>24639, PDB<br>7RQX) | 25 °C RTx<br>Open<br>(EMD-<br>24640, PDB<br>7RQY) | 48 °C RTx<br>Open<br>(EMD-<br>24641, PDB<br>7RQZ) |
|-----------------------------------------------------|-------------------------------------------------|----------------------------------------------------------|--------------------------------------------------|---------------------------------------------------------|---------------------------------------------------|---------------------------------------------------|
| <b>Data collection and processing</b>               |                                                 |                                                          |                                                  |                                                         |                                                   |                                                   |
| Magnification                                       | 81,000                                          | 81,000                                                   | 81,000                                           | 81,000                                                  | 81,000                                            | 81,000                                            |
| Voltage (kV)                                        | 300                                             | 300                                                      | 300                                              | 300                                                     | 300                                               | 300                                               |
| Electron exposure (e <sup>-</sup> /Å <sup>2</sup> ) | 60                                              | 60                                                       | 60                                               | 44                                                      | 44                                                | 50                                                |
| Defocus range (μm)                                  | -2.0 to -0.9                                    | -2.0 to -0.9                                             | -2.0 to -0.9                                     | -1.9 to -0.8                                            | -1.9 to -0.8                                      | -1.9 to -0.8                                      |
| Pixel size (Å)                                      | 1.08                                            | 1.08                                                     | 1.08                                             | 1.029                                                   | 1.029                                             | 1.079                                             |
| Symmetry imposed                                    | C4                                              | C4                                                       | C4                                               | C4                                                      | C4                                                | C4                                                |
| Initial particle images (no.)                       | 729,895                                         | 729,895                                                  | 729,895                                          | 2,679,242                                               | 2,679,242                                         | 995,671                                           |
| Final particle images (no.)                         | 81,347                                          | 70,786                                                   | 107,183                                          | 32,121                                                  | 104,123                                           | 18,341                                            |
| Map resolution (Å)                                  | 3.05                                            | 3.45                                                     | 3.11                                             | 3.36                                                    | 3.04                                              | 3.32                                              |
| FSC threshold                                       | 0.143                                           | 0.143                                                    | 0.143                                            | 0.143                                                   | 0.143                                             | 0.143                                             |
| <b>Refinement</b>                                   |                                                 |                                                          |                                                  |                                                         |                                                   |                                                   |
| Initial model used (PDB code)                       | 7LP9                                            | 7LP9                                                     | 7LP9                                             | 7LP9                                                    | 7LP9                                              | 7LP9                                              |
| Model resolution (Å)                                | 3.05                                            | 3.45                                                     | 3.11                                             | 3.36                                                    | 3.04                                              | 3.32                                              |
| FSC threshold                                       | 0.143                                           | 0.143                                                    | 0.143                                            | 0.143                                                   | 0.143                                             | 0.143                                             |
| Model resolution range (Å)                          | 2.95 – 3.40                                     | 2.75 – 3.70                                              | 3.05 – 3.50                                      | 2.88 – 3.60                                             | 2.97 – 3.43                                       | 2.47 – 3.40                                       |
| Map sharpening <i>B</i> factor (Å <sup>2</sup> )    | -132                                            | -80                                                      | -140                                             | -116                                                    | -137                                              | -97                                               |
| Model composition                                   |                                                 |                                                          |                                                  |                                                         |                                                   |                                                   |
| Nonhydrogen atoms                                   | 19034                                           | 18078                                                    | 17176                                            | 16154                                                   | 16688                                             | 17128                                             |
| Protein residues                                    | 2416                                            | 2320                                                     | 2180                                             | 2016                                                    | 2100                                              | 2128                                              |
| Ligands                                             | 38                                              | 22                                                       | 20                                               | 24                                                      | 16                                                | 20                                                |
| <i>B</i> factors (Å <sup>2</sup> )                  |                                                 |                                                          |                                                  |                                                         |                                                   |                                                   |
| Protein                                             | 58.47                                           | 37.43                                                    | 78.45                                            | 35.30                                                   | 22.32                                             | 19.74                                             |
| Ligand                                              | 29.94                                           | 15.62                                                    | 28.09                                            | 18.32                                                   | 7.73                                              | 9.65                                              |
| R.m.s. deviations                                   |                                                 |                                                          |                                                  |                                                         |                                                   |                                                   |
| Bond lengths (Å)                                    | 0.005                                           | 0.005                                                    | 0.006                                            | 0.003                                                   | 0.005                                             | 0.004                                             |
| Bond angles (°)                                     | 1.040                                           | 1.081                                                    | 1.188                                            | 0.797                                                   | 1.088                                             | 0.703                                             |
| <b>Validation</b>                                   |                                                 |                                                          |                                                  |                                                         |                                                   |                                                   |
| MolProbity score                                    | 1.29                                            | 1.68                                                     | 1.67                                             | 1.60                                                    | 1.53                                              | 1.65                                              |
| Clashscore                                          | 2.98                                            | 7.22                                                     | 6.63                                             | 7.05                                                    | 6.37                                              | 6.10                                              |
| Poor rotamers (%)                                   | 0                                               | 0                                                        | 0                                                | 0                                                       | 0                                                 | 0                                                 |
| Ramachandran plot                                   |                                                 |                                                          |                                                  |                                                         |                                                   |                                                   |
| Favored (%)                                         | 96.79                                           | 95.60                                                    | 95.64                                            | 96.64                                                   | 97.30                                             | 95.41                                             |
| Allowed (%)                                         | 3.21                                            | 4.40                                                     | 4.36                                             | 3.36                                                    | 2.70                                              | 4.59                                              |
| Disallowed (%)                                      | 0                                               | 0                                                        | 0                                                | 0                                                       | 0                                                 | 0                                                 |
